# Supplementary material for: Associations of Vitamin B6 Intake and Plasma Pyridoxal 5′-Phosphate with Plasma Polyunsaturated Fatty Acids in US Older Adults: Findings from NHANES 2003–2004
Source: MDPI journal article supplement (doi:10.3390/nu14112336), 2022-06-02
Supplement: s1 [file s1]

## Supplementary Materials

**Table S1.** Pearson correlation coefficients ( $\rho$ ) between vitamin B6 intake and plasma PLP concentration by gender among US adults aged  $\geq 60$  years, NHANES 2003–2004.

| Vitamin B6 intake<br>(mg/d) |              |         |
|-----------------------------|--------------|---------|
| ALL ( $n=461$ )             |              |         |
| Plasma PLP (nmol/L)         | $\rho$ (rho) | 0.39    |
|                             | $P^1$        | <0.0001 |
| Men ( $n=247$ )             |              |         |
| Plasma PLP (nmol/L)         | $\rho$ (rho) | 0.36    |
|                             | $P^1$        | <0.0001 |
| Women ( $n=214$ )           |              |         |
| Plasma PLP (nmol/L)         | $\rho$ (rho) | 0.42    |
|                             | $P^1$        | <0.0001 |

- PLP, pyridoxal 5'-phosphate.
- Sample size ( $n$ ) is presented as unweighted.
- Log-transformed values of plasma PLP are used for Pearson correlation tests.
- <sup>1</sup> $P$ -value for Pearson correlation tests.
- Number of observations used in the analysis:  $n=421$  for all;  $n=220$  for men;  $n=201$  for women.



**Table S2.** Distributions of original metric intakes of vitamin B6 and PUFA by gender among US adults aged  $\geq 60$  years, NHANES 2003–2004.

|                                              | All ( <i>n</i> =461) |              | Men ( <i>n</i> =247) |              |                             | Women ( <i>n</i> =214) |              |                             |                       |
|----------------------------------------------|----------------------|--------------|----------------------|--------------|-----------------------------|------------------------|--------------|-----------------------------|-----------------------|
|                                              | <i>n</i>             | Mean ± SE    | <i>n</i>             | Mean ± SE    | %RDA<br>or %AI <sup>3</sup> | <i>n</i>               | Mean ± SE    | %RDA<br>or %AI <sup>3</sup> | <i>P</i> <sup>1</sup> |
| Nutrient intake from food                    |                      |              |                      |              |                             |                        |              |                             |                       |
| Dietary vitamin B6 (mg/d)                    | 424                  | 1.78 ± 0.04  | 221                  | 1.95 ± 0.07  | (115%) <sup>4</sup>         | 203                    | 1.63 ± 0.05  | (109%) <sup>4</sup>         | 0.012                 |
| Dietary ALA (g/d)                            | 424                  | 1.49 ± 0.06  | 221                  | 1.63 ± 0.09  | (102%) <sup>5</sup>         | 203                    | 1.37 ± 0.08  | (125%) <sup>5</sup>         | 0.52                  |
| Dietary LA (g/d)                             | 424                  | 14.0 ± 0.57  | 221                  | 15.4 ± 0.75  | (n/a) <sup>5</sup>          | 203                    | 12.9 ± 0.65  | (n/a) <sup>5</sup>          | 0.27                  |
| Dietary EPA (g/d)                            | 424                  | 0.05 ± 0.01  | 221                  | 0.06 ± 0.01  | (n/a) <sup>5</sup>          | 203                    | 0.05 ± 0.01  | (n/a) <sup>5</sup>          | 0.33                  |
| Dietary DHA (g/d)                            | 424                  | 0.10 ± 0.02  | 221                  | 0.11 ± 0.02  | (n/a) <sup>5</sup>          | 203                    | 0.09 ± 0.02  | (n/a) <sup>5</sup>          | 0.20                  |
| Dietary AA (g/d)                             | 424                  | 0.13 ± 0.01  | 221                  | 0.14 ± 0.01  | (n/a) <sup>5</sup>          | 203                    | 0.11 ± 0.01  | (n/a) <sup>5</sup>          | 0.005                 |
| Total fat (g/d)                              | 424                  | 72.50 ± 2.60 | 221                  | 80.41 ± 4.30 | (n/a) <sup>5</sup>          | 203                    | 65.77 ± 2.30 | (n/a) <sup>5</sup>          | 0.48                  |
| Nutrient intake from food<br>and supplements |                      |              |                      |              |                             |                        |              |                             |                       |
| Total vitamin B6 (mg/d)                      | 424                  | 8.82 ± 1.51  | 221                  | 7.39 ± 1.38  | (435%) <sup>4</sup>         | 203                    | 10.04 ± 2.28 | (669%) <sup>4</sup>         | 0.27                  |
| Total ALA (g/d)                              | 424                  | 1.50 ± 0.06  | 221                  | 1.64 ± 0.09  | (103%) <sup>5</sup>         | 203                    | 1.39 ± 0.08  | (126%) <sup>5</sup>         | 0.36                  |
| Total EPA (g/d)                              | 424                  | 0.06 ± 0.01  | 221                  | 0.08 ± 0.02  | (n/a) <sup>5</sup>          | 203                    | 0.05 ± 0.01  | (n/a) <sup>5</sup>          | 0.03                  |
| Total DHA (g/d)                              | 424                  | 0.11 ± 0.02  | 221                  | 0.12 ± 0.02  | (n/a) <sup>5</sup>          | 203                    | 0.09 ± 0.02  | (n/a) <sup>5</sup>          | 0.053                 |

- AA, arachidonic acid; ALA,  $\alpha$ -linolenic acid; DHA, docosahexaenoic acid; EPA, eicosapentaenoic acid; LA, linoleic acid; PLP, pyridoxal 5'-phosphate; PUFA, polyunsaturated fatty acids; SE, standard error; DRI, dietary reference intakes; n/a, not available.
- Sample sizes (*n*) are presented as unweighted.
- Values are expressed as arithmetic means  $\pm$  SE.
- <sup>1</sup> *t*-tests for comparing the means of dependent variables between men and women.
- Number of observations used for *t*-tests: *n*=389 for nutrient intakes.
- Adjusted for demographic variables (age, race/ethnicity), BMI, socioeconomic variables (PIR, educational attainment), physical activity level, cigarette smoking status, alcohol consumption, prescription medication use, and total energy intake.
- <sup>3</sup> %RDA or %AI is calculated by dividing each nutrient intake value by the corresponding RDA or AI value, then multiplying the obtained value by 100.
- <sup>4</sup> Recommended Dietary Allowance (RDA) for vitamin B6: 1.7 mg/d for men  $\geq 51$  y; 1.5 mg/d for women  $\geq 51$  y (Reference: Food and Nutrition Board Institute of Medicine A report of the Standing Committee on the Scientific Evaluation of Dietary Reference Intakes and its Panel on Folate, Other B Vitamins, and Choline and Subcommittee on Upper Reference Levels of Nutrients. Dietary reference intakes for thiamin, riboflavin, niacin, vitamin B6, folate, vitamin B12, pantothenic acid, biotin, and choline; National Academies Press: Washington, DC, 1998).
- <sup>5</sup> Adequate Intake (AI) for ALA: 1.6 g/d for men  $\geq 51$  y; 1.1 g/d for women  $\geq 51$  y; no AIs or RDAs for total fat, EPA, and DHA established by the Institute of Medicine (Reference: Institute of Medicine, Food and Nutrition Board. Dietary reference intakes for energy, carbohydrate, fiber, fat, fatty acids, cholesterol, protein, and amino acids (macronutrients). Washington, DC: National Academy Press, 2005).



**Table S3.** Distributions of iron intake and serum iron levels by gender among US adults aged  $\geq 60$  years, NHANES 2003–2004.

|                                    | All<br>( <i>n</i> =461) |                  | Men<br>( <i>n</i> =247) |                  | Women<br>( <i>n</i> =214) |                  | <i>P</i> <sup>1</sup> |
|------------------------------------|-------------------------|------------------|-------------------------|------------------|---------------------------|------------------|-----------------------|
|                                    | <i>n</i>                | Mean $\pm$ SE    | <i>n</i>                | Mean $\pm$ SE    | <i>n</i>                  | Mean $\pm$ SE    |                       |
| Original metric intake             |                         |                  |                         |                  |                           |                  |                       |
| Dietary Iron (mg/d)                | 424                     | 15.17 $\pm$ 0.59 | 221                     | 16.74 $\pm$ 0.76 | 203                       | 13.83 $\pm$ 0.72 | 0.054                 |
| Total Iron (mg/d)                  | 424                     | 20.54 $\pm$ 0.97 | 221                     | 22.99 $\pm$ 2.13 | 203                       | 18.45 $\pm$ 1.31 | 0.46                  |
| Energy-adjusted intake             |                         |                  |                         |                  |                           |                  |                       |
| Dietary Iron (mg/d)                | 424                     | 15.17 $\pm$ 0.54 | 221                     | 15.42 $\pm$ 0.43 | 203                       | 14.95 $\pm$ 0.74 | 0.09                  |
| Total Iron (mg/d)                  | 424                     | 20.54 $\pm$ 0.83 | 221                     | 21.75 $\pm$ 1.77 | 203                       | 19.50 $\pm$ 1.42 | 0.61                  |
| Serum iron ( $\mu$ mol/L)          | 453                     | 15.00 $\pm$ 0.40 | 242                     | 16.41 $\pm$ 0.37 | 211                       | 13.81 $\pm$ 0.51 | 0.0003                |
| Serum iron category <sup>2,3</sup> |                         |                  |                         |                  |                           |                  | 0.91                  |
| Low                                | 89                      | 16.6 $\pm$ 2.01  | 46                      | 16.4 $\pm$ 2.09  | 43                        | 16.9 $\pm$ 3.44  |                       |
| High                               | 364                     | 83.4 $\pm$ 2.01  | 196                     | 83.6 $\pm$ 2.09  | 168                       | 83.2 $\pm$ 3.44  |                       |

- Sample sizes (*n*) are presented as unweighted.
- Values are expressed as arithmetic means (nutrient intakes) or geometric means (blood variables)  $\pm$  standard error (SE) for continuous variables and sample-weighted percentages (%) with SE for categorical variables.
- Log-transformed values of serum iron and hemoglobin are used for *t*-tests.
- <sup>1</sup> *t*-tests for comparing the means of dependent variables between men and women.
- <sup>2</sup> Rao-Scott chi-square tests to examine whether there are differences in proportions between men and women across categories of each characteristic.
- <sup>3</sup> %  $\pm$  SE.
- Sample sizes for *t*-tests: *n*=389 for iron intake; *n*=383 for serum iron; *n*=389 for hemoglobin.
- For iron intake: adjusted for demographic variables (age, race/ethnicity), BMI, socioeconomic variables (PIR, educational attainment), physical activity level, cigarette smoking status, alcohol consumption, prescription medication use, total energy intake (only for original metric dietary variables)
- For serum iron: adjusted for demographic variables (age, race/ethnicity), BMI, total iron intake, total energy intake, socioeconomic variables (PIR, educational attainment), physical activity level, cigarette smoking status, alcohol consumption, and prescription medication use.
- Low serum iron status is defined as  $<12 \mu\text{mol/L}$  for men and  $<10 \mu\text{mol/L}$  for women (Reference: Krajcovicova-Kudlackova M, Klvanova J, Dusinska M. Polyunsaturated fatty acid plasma content in groups of general population with low vitamin B6 or low iron serum levels. *Ann Nutr Metab.* 2004;48(2):118-121).
